# Supplementary material
Source: PubMed Central journal article supplement (PMC9092414)
Supplement: advancesADV2021006937-suppl1.pdf [file advancesADV2021006937-suppl1.pdf]

**Supplemental Figure S1.** Overview of inclusion of allo-SCT recipients.

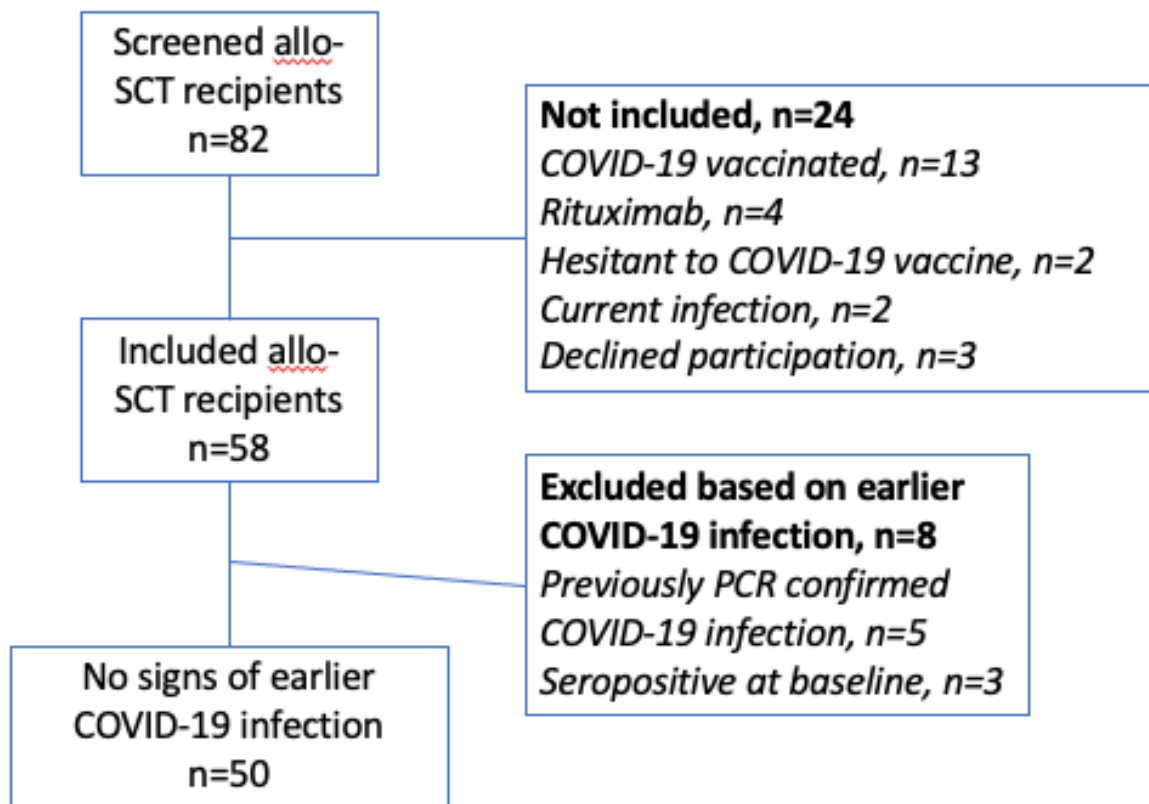

**Supplemental Figure S2. Correlation between antibody and T cell-dependent responses.** IgG antibody levels in serum against the receptor-binding domain (RBD) plotted against T cell-mediated IFN- $\gamma$  production in supernatant plasma following stimulation of whole blood with spike 1 (S1) peptides after two doses of vaccine in allo-SCT recipients (n=49, r=0.52, p=0.001) and healthy controls (n=39, r=0.41, p=0.02).

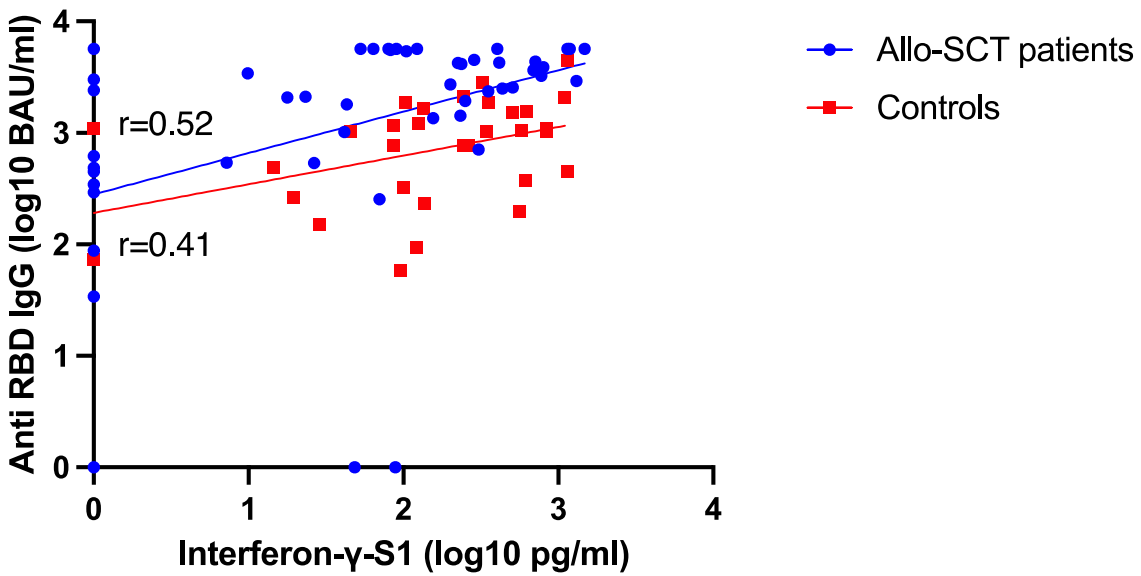

**Supplemental Table S1.** Logistic regression of S1-IFN- $\gamma$  production using the cut-off of  $\geq 10$  pg/mL in the study population (allo-SCT recipients and healthy controls analyzed together).

|                                               | First vaccine dose       |                                 |                      |                  | Second vaccine dose |                    |                      |                  |
|-----------------------------------------------|--------------------------|---------------------------------|----------------------|------------------|---------------------|--------------------|----------------------|------------------|
|                                               | OR <sup>1</sup> (95% CI) | Univariate P-value <sup>3</sup> | Adjusted OR (95% CI) | Adjusted P-value | OR (95% CI)         | Univariate P-value | Adjusted OR (95% CI) | Adjusted P-value |
| Cohort (allo-SCT)                             | 0.13 (0.03-0.52)         | 0.01                            | 0.13 (0.03-0.52)     | 0.01             | 0.2 (0.0-0.8)       | 0.03               | 0.2 (0.0-0.8)        | 0.03             |
| Sex (female)                                  | 2.2 (0.8-5.8)            | 0.13                            | -                    | -                | 1.6 (0.5-4.8)       | 0.41               | -                    | -                |
| Age (years)                                   | 0.98 (0.95-1.02)         | 0.38                            | -                    | -                | 1.0 (0.9-1.0)       | 0.29               | -                    | -                |
| Vaccine (Pfizer)                              | 1.8 (0.6-5.3)            | 0.3                             | -                    | -                | 2.2 (0.7-7.1)       | 0.19               | -                    | -                |
| Time FU <sup>2</sup> test to vaccine 2 (days) | NA <sup>4</sup>          | NA                              | NA                   | NA               | 1.0 (1.0-1.0)       | 0.43               | -                    | -                |

<sup>1</sup>Odds ratio with confidence intervals (CI)

<sup>2</sup>Follow-up

<sup>3</sup>Statistics using logistic regression

<sup>4</sup>Not applicable

**Supplemental Table S2.** Logistic regression of anti-RBD-S1 IgG  $\geq 100$  BAU/mL in the whole study population (allo-SCT recipients and healthy controls analyzed together).

|                                             | First vaccine dose       |                                 |                      |                               | Second vaccine dose |                    |                      |                  |
|---------------------------------------------|--------------------------|---------------------------------|----------------------|-------------------------------|---------------------|--------------------|----------------------|------------------|
|                                             | OR <sup>3</sup> (95% CI) | Univariate P-value <sup>4</sup> | Adjusted OR (95% CI) | Adjusted P-value <sup>4</sup> | OR (95% CI)         | Univariate p-value | Adjusted OR (95% CI) | Adjusted p-value |
| Cohort (allo-SCT <sup>1</sup> )             | 0.3 (0.1-1.1)            | 0.07                            | 0.3 (0.1-1.2)        | 0.08                          | 0.8 (0.2-3.5)       | 0.73               |                      |                  |
| Sex (female)                                | 1.6 (0.6-4.2)            | 0.39                            | –                    |                               | 3.9 (0.7-20.3)      | 0.11               |                      |                  |
| Age (years)                                 | 1.0 (0.9-1.0)            | 0.03                            | 1.0 (0.9-1.0)        | 0.09                          | 1.0 (0.9-1.0)       | 0.35               |                      |                  |
| Vaccine (Pfizer)                            | 2.7 (0.8-8.7)            | 0.1                             | 0.7 (0.1-4.1)        | 0.64                          | 1.2 (0.2-6.2)       | 0.87               |                      |                  |
| Time FU <sup>2</sup> -test vaccine 2 (days) |                          |                                 |                      |                               | 1.0 (1.0-1.0)       | 0.07               |                      |                  |

<sup>1</sup>Allogeneic stem cell transplantation

<sup>2</sup>Follow-up

<sup>3</sup>Odds ratio with confidence intervals (CI)

<sup>4</sup>Statistics by logistic regression
